# Supplementary material for: A Discrete Model of Drosophila Eggshell Patterning Reveals Cell-Autonomous and Juxtacrine Effects
Source: PubMed Central journal article supplement (PMC3967936; doi:10.1371/journal.pcbi.1003527), 2014-03-27
Supplement: pcbi.1003527.s002.pdf [file pcbi.1003527.s002.pdf]

## Documentation of the mechanistic, single-cell model

This supplementary material provides a summary of published evidence in support of the nodes and their relationships at the core of our model (Figure 3).

### Input nodes

These nodes embody external influences and have no associated logical function.

#### Dpp

Decapentaplegic is a BMP ligand (a TGF- $\beta$  superfamily member), secreted from the stretched FCs that overlay the nurse cells, and from stage 10 onwards in the centripetally migrating follicle cells [1]. It signals to the follicular epithelium through receptors Wit [30] and Tkv.

At stage 10, Dpp/BMP signaling activity can be detected in a narrow band along the anterior border of the follicular epithelium, slightly larger at the dorsal side [2,3].

#### Grk

Gurken is a TGF- $\alpha$  like protein secreted by the oocyte. It accumulates around the oocyte nucleus in the dorsal-anterior corner from stage 8 [4,5] and signals to the overlying follicular epithelium until the formation of the vitelline membrane at stage 10B [6].

#### Br\_adj

This node denotes Br presence in neighboring cells (only those directly adjacent).

#### Aos\_ext

This node denotes Aos presence in neighboring cells.

#### Rho\_ext

This node denotes Rho presence in neighboring cells.

#### earlyBMP

*dpp* expression is first detectable at the end of stage 8 in approximately 20 to 30 somatic follicle cells at the anterior tip of the egg chamber [1]. However, there is evidence that the BMP pathway is active in early (<stage 6) egg chambers [7].

#### earlyEGF

Gurken is a TGF- $\alpha$  like protein secreted by the oocyte. In early stages, it is located in the posterior pole [4,5], where it activates EGF signaling in the overlying follicle cells.

### Core nodes

The behavior of these “internal nodes” depends on other nodes (described in the bullet lists) following rules given in Figure 3.

#### Aos

*argos* expression begins around stage 10A in the dorsal centripetal follicle cells, before extending to the dorsal midline. The patch splits around stage 11-12 into a pattern reminiscent of the late pattern of *rho* [6,8–10]. It is targeted by

- Pnt, which induces *aos* in the neuroectoderm [11].  
Overexpression of *pntP1* may reduce expression of EGF signaling targets *rhomboid* and *69D* (unpublished data mentioned by [12]).  
Pnt may induce *aos* in the FCE (unpublished data mentioned by [6]).
- dpERK: in addition to the *argos* expression pattern, we know that in intervein cells in the wing imaginal disc, *aos* transcription is repressed by Cic in a cell autonomous way; Cic itself is targeted for degradation through the EGF signaling pathway [3,13–15].
- Mid: when EGFR is ectopically activated in the epithelium, *aos* transcription is restricted to the anterior side [8], which suggests repression by Mid.

## **Br**

Broad-Complex (Br-C), is a transcription factor. It is a key marker of the roof region, expressed in two large patches of cells on each side of the dorsal midline [2,7,16–21]. *broad* mRNA is initially present at low levels everywhere, then repressed in an antero-dorsal T-shaped domain, before increasing in the roof domains and finally decreasing everywhere else.

*br* expression is controlled by two promoters [22]; only the BrL promoter is considered here.

- *Mirr* is required both to upregulate Br-C in the normal appendage primordium, and to downregulate it in the entire dorsal epithelium [20]. Fuchs et al. showed that *Mirr* activates the BrL promoter (late, Roof-specific Br pattern) and represses the BrE promoter (Early, ubiquitous Br pattern) [22].
- *Pnt* represses BrL (promoter controlling *broad* late expression) [22].

## **dpERK**

Activation of the EGF pathway may be visualized directly through MAPK or ERK phosphorylation (indicated with dpERK), starting from a midline-centered pattern, which expands to encompass a larger part of the dorsal-anterior domain, before regressing to a spectacle-like pattern and finally to the L-shape pattern characteristic of the floor domain [6,9,10,21]. It is targeted by

- *Gkr* activates EGFR [4,8].
- *Argos* inhibits EGFR signaling by sequestering Spitz [23]. Secreted Spitz (after being cleaved by Rhomboid) activates EGFR [24–26].
- *X*, corresponding to a hypothetical enhancement of EGFR activity via a juxtacrine signal from the roof.

## **Mid**

Midline expression marks the posterior domain of the follicular epithelium [27].

- earlyEGF: early, posterior Grk signalling activates *Mid* expression [27].
- earlyBMP: there is indirect evidence that BMP signaling affects the posterior boundary of the appendage primordia [8,18,28]. Considering the contrasting results of BMP pathway disruption on *br* expression [3,28–30], we postulate that this effect has to occur early, and propose it functions through repression of *mid*.

## **Mirr**

The transcription factor *Mirror* is activated in a large dorsal-anterior patch of the epithelium by low levels of EGFR activity [28,31,32].

- dpERK; *mirr* is induced in a large dorsal-anterior patch of the epithelium by low levels of EGF activity through *Cic* [14,28,31,32].
- *Mid* represses *mirr* and its target *br* [27].

## **Pnt**

The gene encoding the transcription factor *Pointed* is expressed along the dorsal midline at stage 10A, and in the roof region at stages 10B-11 [3,12].

- dpERK: *pnt* is induced by high levels of EGF signaling activity [2,11,12].

## **Rho**

*rho* expression pattern seems to correlate with EGF signaling activity as it evolves from the whole dorsal-anterior region in early stages to the characteristic one-cell wide floor region, adjacent to the roof, in late stages [4,8,33,34]. Rhomboid, a protease, cleaves Spitz, which is then secreted [25,26].

- *Mirr*: ectopic expression of *mirr* induces *rho* ectopic expression [31,35]. There is evidence that some anterior clue is required to induce *rhomboid* [8,18,29], and *mirror* could relay that signal to Rho.
- *Br*, which is required cell-autonomously to repress *rho* expression. Broad binding sites are predicted in the promoter region of *rho* [36].
- dpERK: *rho* transcription is repressed by the transcription factor CF2 [34]; CF2 is downregulated by the EGFR pathway [37].
- *Dpp* signaling represses *br* in the anterior follicle cells, via pMAD; strong *dpp* overexpression represses *Br* entirely [2,3].

## Integration nodes

### A

Combines the values of Aos and Aos\_ext.

- Aos and Aos\_ext: Argos is secreted [38]. The *argos* gene encodes a diffusible factor that regulates cell fate decisions in the Drosophila eye. Rule for the epithelial model:  
level 1: at least 5 cells among the proper cell and 126 neighbors (direct and or at a distance up to 6 cells) express Aos.

### S

Combines the values of Rho and Rho\_ext, to account for Spitz signaling.

- Rho and Rho\_ext: Rho activates Spitz, which is then secreted [25,26]. Rules for the epithelial model:  
level 2: autocrine (Rho at level 2) or at least 6 cells over six (direct) neighbors  
level 1: autocrine (Rho at level 1) or between 2 and 5 cells among the six (direct) neighbors.

### X

Hypothetical mechanism. EGFR activity seems to be enhanced in cells in contact with the roof region ("spectacle-shaped" pattern in [9,10,21]). Moreover, Rho is expressed along the high-Notch side of a high/low Notch border; ectopic *rho* expression may be induced by ectopic high/low Notch barriers generated by Notch-clones [36].

- Br\_adj and Br. Br is taken as a marker of the roof. As such, it activates X in the neighboring cells, while inhibiting it in the roof itself.

## References

1. Twombly V, Blackman RK, Jin H, Graff JM, Padgett RW, et al. (1996) The TGF-beta signaling pathway is essential for Drosophila oogenesis. *Development* 122: 1555–1565.
2. Deng WM, Bownes M (1997) Two signalling pathways specify localised expression of the Broad-Complex in Drosophila eggshell patterning and morphogenesis. *Development* 124: 4639–4647.
3. Yakoby N, Lembong J, Schüpbach T, Shvartsman SY (2008) Drosophila eggshell is patterned by sequential action of feedforward and feedback loops. *Development* 135: 343–351. doi:10.1242/dev.008920.
4. Neuman-Silberberg FS, Schupbach T (1994) Dorsoventral axis formation in Drosophila depends on the correct dosage of the gene *gurken*. *Development* 120: 2457–2463.
5. Neuman-Silberberg FS, Schüpbach T (1996) The Drosophila TGF-alpha-like protein *Gurken*: expression and cellular localization during Drosophila oogenesis. *Mech Dev* 59: 105–113.
6. Wasserman JD, Freeman M (1998) An autoregulatory cascade of EGF receptor signaling patterns the Drosophila egg. *Cell* 95: 355–364.
7. Chen Y, Schüpbach T (2006) The role of *brinker* in eggshell patterning. *Mech Dev* 123: 395–406. doi:10.1016/j.mod.2006.03.007.
8. Queenan AM, Ghabrial A, Schüpbach T (1997) Ectopic activation of *torpedo/Egfr*, a Drosophila receptor tyrosine kinase, dorsalizes both the eggshell and the embryo. *Development* 124: 3871–3880.
9. Peri F, Bökel C, Roth S (1999) Local *Gurken* signaling and dynamic MAPK activation during Drosophila oogenesis. *Mech Dev* 81: 75–88.
10. Nakamura Y, Matsuno K (2003) Species-specific activation of EGF receptor signaling underlies evolutionary diversity in the dorsal appendage number of the genus *Drosophila* eggshells. *Mech Dev* 120: 897–907. doi:10.1016/S0925-4773(03)00164-3.
11. Chang D, Xu N, Luo K (2003) Degradation of cyclin B is required for the onset of anaphase in Mammalian cells. *J Biol Chem* 278: 37865–37873. doi:10.1074/jbc.M306376200.

12. Morimoto AM, Jordan KC, Tietze K, Britton JS, O'Neill EM, et al. (1996) Pointed, an ETS domain transcription factor, negatively regulates the EGF receptor pathway in *Drosophila* oogenesis. *Development* 122: 3745–3754.
13. Roch F, Jiménez G, Casanova J (2002) EGFR signalling inhibits Capicua-dependent repression during specification of *Drosophila* wing veins. *Development* 129: 993–1002.
14. Atkey MR, Lachance J-FB, Walczak M, Rebello T, Nilson LA (2006) Capicua regulates follicle cell fate in the *Drosophila* ovary through repression of mirror. *Development* 133: 2115–2123. doi:10.1242/dev.02369.
15. Astigarraga S, Grossman R, Díaz-Delfin J, Caelles C, Paroush Z, et al. (2007) A MAPK docking site is critical for downregulation of Capicua by Torso and EGFR RTK signaling. *EMBO J* 26: 668–677. doi:10.1038/sj.emboj.7601532.
16. Tzolovsky G, Deng WM, Schlitt T, Bownes M (1999) The function of the broad-complex during *Drosophila* melanogaster oogenesis. *Genetics* 153: 1371–1383.
17. Dequier E, Souid S, Pál M, Maróy P, Lepesant JA, et al. (2001) Top-DER- and Dpp-dependent requirements for the *Drosophila* *fos/kayak* gene in follicular epithelium morphogenesis. *Mech Dev* 106: 47–60.
18. Ward EJ, Berg CA (2005) Juxtaposition between two cell types is necessary for dorsal appendage tube formation. *Mech Dev* 122: 241–255. doi:10.1016/j.mod.2004.10.006.
19. Yakoby N, Bristow CA, Gong D, Schafer X, Lembong J, et al. (2008) A combinatorial code for pattern formation in *Drosophila* oogenesis. *Dev Cell* 15: 725–737. doi:10.1016/j.devcel.2008.09.008.
20. Boisclair Lachance J-F, Fregoso Lomas M, Eleiche A, Bouchard Kerr P, Nilson LA (2009) Graded *Egfr* activity patterns the *Drosophila* eggshell independently of autocrine feedback. *Development* 136: 2893–2902. doi:10.1242/dev.036103.
21. Zartman JJ, Kanodia JS, Cheung LS, Shvartsman SY (2009) Feedback control of the EGFR signaling gradient: superposition of domain-splitting events in *Drosophila* oogenesis. *Development* 136: 2903–2911. doi:10.1242/dev.039545.
22. Fuchs A, Cheung LS, Charbonnier E, Shvartsman SY, Pyrowolakis G (2012) Transcriptional interpretation of the EGF receptor signaling gradient. *Proc Natl Acad Sci USA* 109: 1572–1577. doi:10.1073/pnas.1115190109.
23. Klein DE, Nappi VM, Reeves GT, Shvartsman SY, Lemmon MA (2004) Argos inhibits epidermal growth factor receptor signalling by ligand sequestration. *Nature* 430: 1040–1044. doi:10.1038/nature02840.
24. Rutledge BJ, Zhang K, Bier E, Jan YN, Perrimon N (1992) The *Drosophila* *spitz* gene encodes a putative EGF-like growth factor involved in dorsal-ventral axis formation and neurogenesis. *Genes Dev* 6: 1503–1517.
25. Lee LA, Elfring LK, Bosco G, Orr-Weaver TL (2001) A genetic screen for suppressors and enhancers of the *Drosophila* PAN GU cell cycle kinase identifies cyclin B as a target. *Genetics* 158: 1545–1556.
26. Urban S, Lee JR, Freeman M (2001) *Drosophila* rhomboid-1 defines a family of putative intramembrane serine proteases. *Cell* 107: 173–182.
27. Fregoso Lomas M, Hails F, Lachance J-FB, Nilson LA (2013) Response to the dorsal anterior gradient of EGFR signaling in *Drosophila* oogenesis is prepatterned by earlier posterior EGFR activation. *Cell Reports* 4: 791–802. doi:10.1016/j.celrep.2013.07.038.
28. Shrivage BV, Altmann G, Technau M, Roth S (2007) The role of Dpp and its inhibitors during eggshell patterning in *Drosophila*. *Development* 134: 2261–2271. doi:10.1242/dev.02856.
29. Peri F, Roth S (2000) Combined activities of Gurken and decapentaplegic specify dorsal chorion structures of the *Drosophila* egg. *Development* 127: 841–850.
30. Marmion RA, Jevtic M, Springhorn A, Pyrowolakis G, Yakoby N (2013) The *Drosophila* BMPRII, wishful thinking, is required for eggshell patterning. *Dev Biol* 375: 45–53. doi:10.1016/j.ydbio.2012.12.011.
31. Jordan KC, Clegg NJ, Blasi JA, Morimoto AM, Sen J, et al. (2000) The homeobox gene mirror links EGF signalling to embryonic dorso-ventral axis formation through notch activation. *Nat Genet* 24: 429–433. doi:10.1038/74294.
32. Zhao D, Woolner S, Bownes M (2000) The Mirror transcription factor links signalling pathways in *Drosophila* oogenesis. *Dev Genes Evol* 210: 449–457. doi:10.1007/s004270050332.
33. Ruohola-Baker H, Grell E, Chou TB, Baker D, Jan LY, et al. (1993) Spatially localized rhomboid is required for establishment of the dorsal-ventral axis in *Drosophila* oogenesis. *Cell* 73: 953–965.
34. Hsu T, Bagni C, Sutherland JD, Kafatos FC (1996) The transcriptional factor CF2 is a mediator of EGF-R-activated dorsoventral patterning in *Drosophila* oogenesis. *Genes Dev* 10: 1411–1421.

doi:10.1101/gad.10.11.1411.

35. Jordan KC, Hatfield SD, Tworoger M, Ward EJ, Fischer KA, et al. (2005) Genome wide analysis of transcript levels after perturbation of the EGFR pathway in the *Drosophila* ovary. *Dev Dyn* 232: 709–724.  
doi:10.1002/dvdy.20318.
36. Ward EJ, Zhou X, Riddiford LM, Berg CA, Ruohola-Baker H (2006) Border of Notch activity establishes a boundary between the two dorsal appendage tube cell types. *Dev Biol* 297: 461–470.  
doi:10.1016/j.ydbio.2006.05.021.
37. Mastrova EY, Hsu T (1998) Down-regulation of transcription factor CF2 by *Drosophila* Ras/MAP kinase signaling in oogenesis: cytoplasmic retention and degradation. *Genes Dev* 12: 1166–1175.
38. Freeman M, Klämbt C, Goodman CS, Rubin GM (1992) The *argos* gene encodes a diffusible factor that regulates cell fate decisions in the *Drosophila* eye. *Cell* 69: 963–975.
